# Supplementary material for: Carbon and sediment fluxes inhibited in the submarine Congo Canyon by landslide-damming
Source: Springer Nature journal article supplement (doi:10.1038/s41561-022-01017-x), 2022-09-29
Supplement: MOESM1 [file 41561_2022_1017_MOESM1_ESM.pdf]

**Supplementary information**

---

**Carbon and sediment fluxes inhibited in the submarine Congo Canyon by landslide-damming**

---

In the format provided by the authors and unedited

1 **Extended Data Figures**

2 Extended Data Figure 1. Two other possible canyon-flank landslides identified in the 2019 bathymetry.

3 a) Possible landslide headscarp and deposit which are interpreted to have involved similar processes

4 to those envisaged for the canyon-flank landslide seen in Fig. 2. b) Canyon-flank landslide appears to

5 constrict the canyon floor leading to the development of a new thalweg channel due to enhanced

6 turbidity current erosional capacity. Processes envisaged here are similar to those described in Fig. 4a,

7 c.

8

9

10 **Supplementary material**

11 **SM1. Other possible canyon-flank landslides in the 2019 data**

12 Other features visible in the 2019 bathymetry data are also interpreted as potential canyon-flank  
13 landside deposits (SFig. 1). However, in neither case did the canyon-flank landslide occur between  
14 2005 and 2019. Therefore, we cannot say for certain that the interpreted morphology is a  
15 consequence of a canyon-flank landslide. A first possible headscarp and deposit, with similar  
16 morphologies to that seen in the upper part of the study area (Fig. 2b), are located at 1980 m water  
17 depth on the northern canyon-flank (SFig. 1a). If indeed a canyon-flank landslide, the headwall is 200  
18 m high and 290 m wide with a perimeter of 1.73 km. Here, the main canyon thalweg is situated  
19 between the landslide headscarp and the interpreted deposit. The shape of the infill is suggestive of  
20 a palaeo-meander which has been cut-off.

21 A second potential landslide complex with a different morphology is observed at 1300 m water depth  
22 on the northern canyon-flank, at the eastern end of the study area (SFig. 1b). Here, multiple  
23 headscarps are associated with a lobate deposit covering 0.65 km<sup>2</sup>. The deposit constricts the canyon  
24 thalweg, but does not block it. A channel, which has been incised into the canyon floor meanders  
25 around the landslide deposit with a knickpoint up-canyon of the deposit (SFig. 1b). The channel is 6  
26 km long with a maximum depth and width of 10 and 200 m, respectively. We interpret the processes  
27 associated with this canyon-flank landslide to be similar to those described in Fig. 4a, c.

28

29 **Supplementary Tables**

30 Supplementary Table 1. Submarine canyons where high resolution multibeam bathymetry is available.  
31 Studies which include repeat multibeam bathymetry similar to this study are identified. Mass wasting  
32 features, terraces and canyon sidewalls similar to those observed in this study are described.  
33 Bathymetry examples of the described features are also shown. For example, terraces are identified  
34 which are likely to be areas of high sediment accumulation, and may be prone to collapse. Other  
35 examples where submarine canyons exhibit similar seafloor geomorphic features in 3-D seismic data,  
36 such as the Niger Channel, but where bathymetric data has not been published have been omitted.

37

| Canyon/<br>Margin | Date of<br>Survey | Multibeam<br>bathymetry<br>resolution<br>(m) | Reference                           | Description<br>of mass<br>wasting or<br>terrace<br>features                                                                                                | Swath bathymetry of submarine canyon showing similar landslide or terrace features as<br>identified in the Congo Canyon |
|-------------------|-------------------|----------------------------------------------|-------------------------------------|------------------------------------------------------------------------------------------------------------------------------------------------------------|-------------------------------------------------------------------------------------------------------------------------|
| Dohrn             | 2000 -<br>2014    | 10                                           | Aiello et al.<br>2020 <sup>51</sup> | Landslide<br>scars located<br>around the<br>rim of the<br>canyon.<br>Additional<br>slope failure<br>deposits<br>identifiable<br>in seismic<br>profile data |                                                                                                                         |
| Magnaghi          | 2000 -<br>2014    | 10                                           | Aiello et al.<br>2020 <sup>51</sup> | Slope failure<br>deposits<br>identifiable<br>in seismic<br>profile data                                                                                    |                                                                                                                         |

|             |            |                                                          |                                                                            |                                                                                                                                |  |
|-------------|------------|----------------------------------------------------------|----------------------------------------------------------------------------|--------------------------------------------------------------------------------------------------------------------------------|--|
| Andøya      | 2004, 2005 | 5 (shallower than 1000 m)<br><br>25 (deeper than 1000 m) | Amundsen et al. 2015 <sup>52</sup><br><br>Laberg et al. 2007 <sup>53</sup> | Landslide headwalls visible in bathymetry.                                                                                     |  |
| Cap Timiris | 2003       | Not reported                                             | Antrobreh and Krastel 2006 <sup>54</sup>                                   | Slump deposits identifiable in canyon thalweg from steep canyon walls.<br><br>Similar arcuate terrace features to Congo Canyon |  |

|          |             |              |                                     |                                                                                                                                              |                                                                                                                                                                                                                                                                                                                                                                                                                                                                                                                                                                                                                                                                                          |
|----------|-------------|--------------|-------------------------------------|----------------------------------------------------------------------------------------------------------------------------------------------|------------------------------------------------------------------------------------------------------------------------------------------------------------------------------------------------------------------------------------------------------------------------------------------------------------------------------------------------------------------------------------------------------------------------------------------------------------------------------------------------------------------------------------------------------------------------------------------------------------------------------------------------------------------------------------------|
| Bourcart | 1995 – 2002 | Not reported | Baztan et al. 2005 <sup>55</sup>    | Slide headwalls visible in bathymetry and seismic cross sections                                                                             | 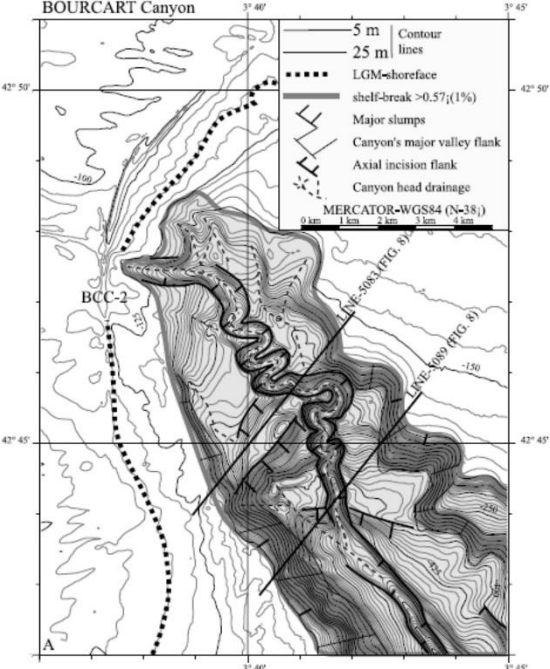 <p>The figure is a bathymetric map of Bourcart Canyon. It features contour lines at 5 m and 25 m intervals. A dashed line represents the LGM-shoreface, and a thick black line indicates a shelf-break with a slope greater than 0.57 (1%). The map identifies major slumps, the canyon's major valley flank, axial incision flanks, and the canyon head drainage. A specific location is marked as BCC-2. The map uses a Mercator-WGS84 projection (N=38) and includes a scale bar from 0 to 4 km. Geographic coordinates range from 3° 40' to 3° 45' longitude and 42° 45' to 42° 50' latitude.</p> |
| Biobío   | 2011        | 5            | Bernhardt et al. 2015 <sup>56</sup> | <p>Arcuate headscarps present with hummocky material partially blocking the canyon.</p> <p>Additional detachment surfaces are visible in</p> |  <p>The figure shows a bathymetric map of Biobío Canyon. It highlights features such as headscarps, incised banks, mass failure zones, and crescent-shaped bedforms (CSBs). A specific location is marked as gc14. The map includes a scale bar from 0 to 4 km and a color-coded water depth scale from 0 to -2000 meters. Geographic coordinates are provided along the axes, ranging from 660000 to 664000 longitude and 5922000 to 5960000 latitude.</p>                                                                                                                                          |

|           |                                 |    |                                   | seismic profiles                                                                                                                                    |                                                                                                                                                                                                                                                                                                                                                                                                                                                                                                                                             |         |            |      |     |       |     |       |     |      |     |     |  |     |  |     |  |
|-----------|---------------------------------|----|-----------------------------------|-----------------------------------------------------------------------------------------------------------------------------------------------------|---------------------------------------------------------------------------------------------------------------------------------------------------------------------------------------------------------------------------------------------------------------------------------------------------------------------------------------------------------------------------------------------------------------------------------------------------------------------------------------------------------------------------------------------|---------|------------|------|-----|-------|-----|-------|-----|------|-----|-----|--|-----|--|-----|--|
| Cap Lopez | 2004 – 2008 (repeat bathymetry) | 10 | Biscara et al. 2013 <sup>57</sup> | Canyon flank landslide identified. Estimated mass of $95,000 \text{ m}^3 \pm 15,000 \text{ m}^3$ . 60% of thalweg deposit reworked within one year. | <p><b>A</b> 2006-2007</p> <p>Landslide headscarp</p> <p>Landslide deposit</p> <p><b>Sediment thickness (m)</b></p> <table border="1"> <tr> <th>Erosion</th> <th>Deposition</th> </tr> <tr> <td>&gt; 20</td> <td>1-2</td> </tr> <tr> <td>15-20</td> <td>2-4</td> </tr> <tr> <td>10-15</td> <td>4-6</td> </tr> <tr> <td>5-10</td> <td>&gt; 6</td> </tr> <tr> <td>4-5</td> <td></td> </tr> <tr> <td>2-4</td> <td></td> </tr> <tr> <td>1-2</td> <td></td> </tr> </table> <p><b>Bathymetry (m)</b></p> <p>0 to 100</p> <p><b>B</b> 2006-2008</p> | Erosion | Deposition | > 20 | 1-2 | 15-20 | 2-4 | 10-15 | 4-6 | 5-10 | > 6 | 4-5 |  | 2-4 |  | 1-2 |  |
| Erosion   | Deposition                      |    |                                   |                                                                                                                                                     |                                                                                                                                                                                                                                                                                                                                                                                                                                                                                                                                             |         |            |      |     |       |     |       |     |      |     |     |  |     |  |     |  |
| > 20      | 1-2                             |    |                                   |                                                                                                                                                     |                                                                                                                                                                                                                                                                                                                                                                                                                                                                                                                                             |         |            |      |     |       |     |       |     |      |     |     |  |     |  |     |  |
| 15-20     | 2-4                             |    |                                   |                                                                                                                                                     |                                                                                                                                                                                                                                                                                                                                                                                                                                                                                                                                             |         |            |      |     |       |     |       |     |      |     |     |  |     |  |     |  |
| 10-15     | 4-6                             |    |                                   |                                                                                                                                                     |                                                                                                                                                                                                                                                                                                                                                                                                                                                                                                                                             |         |            |      |     |       |     |       |     |      |     |     |  |     |  |     |  |
| 5-10      | > 6                             |    |                                   |                                                                                                                                                     |                                                                                                                                                                                                                                                                                                                                                                                                                                                                                                                                             |         |            |      |     |       |     |       |     |      |     |     |  |     |  |     |  |
| 4-5       |                                 |    |                                   |                                                                                                                                                     |                                                                                                                                                                                                                                                                                                                                                                                                                                                                                                                                             |         |            |      |     |       |     |       |     |      |     |     |  |     |  |     |  |
| 2-4       |                                 |    |                                   |                                                                                                                                                     |                                                                                                                                                                                                                                                                                                                                                                                                                                                                                                                                             |         |            |      |     |       |     |       |     |      |     |     |  |     |  |     |  |
| 1-2       |                                 |    |                                   |                                                                                                                                                     |                                                                                                                                                                                                                                                                                                                                                                                                                                                                                                                                             |         |            |      |     |       |     |       |     |      |     |     |  |     |  |     |  |



|                      |            |                                                                |                                      |                                                                         |                                                                                      |
|----------------------|------------|----------------------------------------------------------------|--------------------------------------|-------------------------------------------------------------------------|--------------------------------------------------------------------------------------|
| Cape D'Orlando Basin | 2011, 2012 | 1 (0 – 100 m water depth)<br><br>20 (100 – 1000 m water depth) | Casalbore et al. 2020 <sup>58</sup>  | 280 landslide scars recognised in bathymetry down to 550 m water depth. | 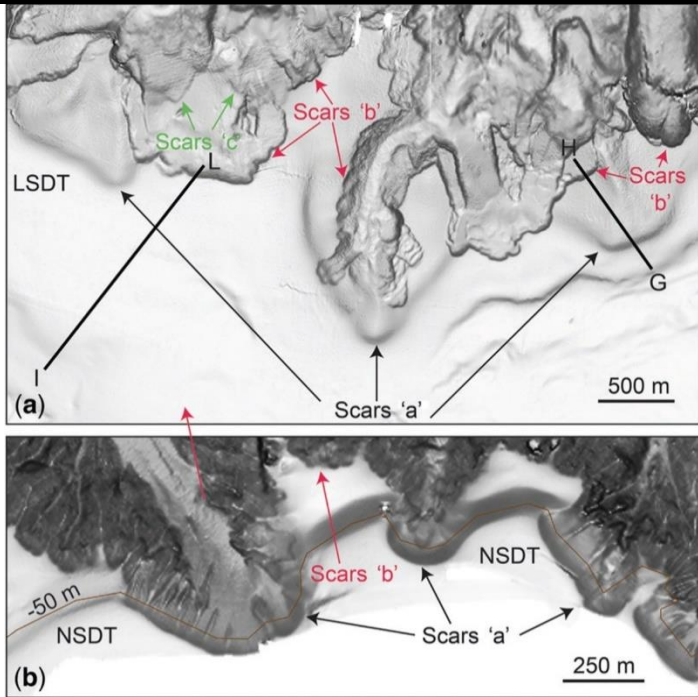   |
| Areia Branca         | 2011       | 50                                                             | de Almedia et al. 2015 <sup>59</sup> | Arcuate headwalls with the presence of marginal terraces                |  |
| Grossos              | 2011       | 50                                                             | de Almedia et al. 2015 <sup>59</sup> |                                                                         |                                                                                      |
| Mossoro              | 2011       | 50                                                             | de Almedia et al. 2015 <sup>59</sup> | Landslide scars on canyon walls.                                        |                                                                                      |

|                 |      |    |                                      |                                               |                                                                                     |
|-----------------|------|----|--------------------------------------|-----------------------------------------------|-------------------------------------------------------------------------------------|
| Apodi           | 2011 | 50 | de Almedia et al. 2015 <sup>59</sup> | Mass movement deposit in the canyon axis.     |                                                                                     |
| Ponta do Mel    | 2011 | 50 | de Almedia et al. 2015 <sup>59</sup> |                                               | 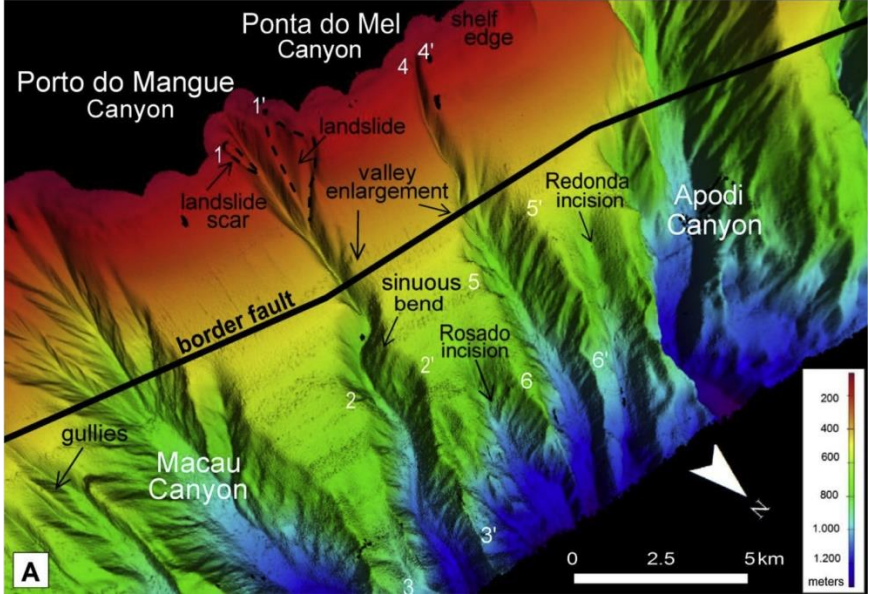 |
| Porto do Manguê | 2011 | 50 | de Almedia et al. 2015 <sup>59</sup> | Triangular landslide scars in the canyon head |                                                                                     |

|       |      |    |                                      |  |                                                                                                                                                                                                                                                                                                                                                                                                                                                                                                                                                                                                                                                                                                                                                                                                                                   |
|-------|------|----|--------------------------------------|--|-----------------------------------------------------------------------------------------------------------------------------------------------------------------------------------------------------------------------------------------------------------------------------------------------------------------------------------------------------------------------------------------------------------------------------------------------------------------------------------------------------------------------------------------------------------------------------------------------------------------------------------------------------------------------------------------------------------------------------------------------------------------------------------------------------------------------------------|
| Macau | 2011 | 50 | de Almedia et al. 2015 <sup>59</sup> |  | <p>The figure is a topographic map of a canyon system. The upper portion is labeled 'Macau Canyon' and the lower portion 'Porto do Mangué Canyon'. A prominent 'border fault' is shown as a diagonal line separating the two canyon sections. The map features various gully types: 'feeding gullies' at the top, 'gullies' on a 'non excavated slope', 'well-developed gullies' in the middle, and 'wall gullies' on the right. A 'shelf edge' is marked with '1' at the top right. Elevation contours are marked with '1', '2', and '3' at different levels. A color scale on the right indicates elevation in meters, ranging from 200 (red) to 1,200 (blue). A scale bar at the bottom left shows 0, 2.5, and 5 km. A north arrow is in the top left corner. The letter 'A' is in the bottom left corner of the map area.</p> |
|-------|------|----|--------------------------------------|--|-----------------------------------------------------------------------------------------------------------------------------------------------------------------------------------------------------------------------------------------------------------------------------------------------------------------------------------------------------------------------------------------------------------------------------------------------------------------------------------------------------------------------------------------------------------------------------------------------------------------------------------------------------------------------------------------------------------------------------------------------------------------------------------------------------------------------------------|

|     |      |    |                                      |                                                     |  |
|-----|------|----|--------------------------------------|-----------------------------------------------------|--|
| Acu | 2011 | 50 | de Almedia et al. 2015 <sup>59</sup> | Arcuate headwalls associated with terraces present. |  |
|-----|------|----|--------------------------------------|-----------------------------------------------------|--|

|                     |                  |     |                                    |                                                                                                                                                                                                                              |  |
|---------------------|------------------|-----|------------------------------------|------------------------------------------------------------------------------------------------------------------------------------------------------------------------------------------------------------------------------|--|
| Hattaras Transverse | 2005, 2008, 2012 | 100 | Gardner et al. 2016 <sup>60</sup>  | Landslide scarps and deposits occur across large sections of the canyon. Deposits as high as 25 m down canyon of the confluence of the Hattaras Transverse and Lower Hattaras Canyons have impeded present flow down-canyon. |  |
| Leven               |                  | 10  | Green and Uken, 2008 <sup>61</sup> | Arcuate headwalls in canyon head and on mid-canyon walls.                                                                                                                                                                    |  |

|             |  |    |                                                                     |                                                           |
|-------------|--|----|---------------------------------------------------------------------|-----------------------------------------------------------|
|             |  |    | Green, 2011 <sup>62</sup>                                           |                                                           |
| Leadsman    |  | 10 | Green and Uken, 2008 <sup>61</sup><br><br>Green, 2011 <sup>62</sup> | Arcuate headwalls in canyon head and on mid-canyon walls. |
| Diepgat     |  | 10 | Green and Uken, 2008 <sup>61</sup><br><br>Green, 2011 <sup>62</sup> | Arcuate headwalls and terraces identifiable.              |
| Wright      |  | 10 | Green and Uken, 2008 <sup>61</sup><br><br>Green, 2011 <sup>62</sup> | Arcuate headwalls in canyon head and on mid-canyon walls. |
| White Sands |  | 10 | Green and Uken, 2008 <sup>61</sup>                                  | Landslide deposit visible in channel thalweg in           |

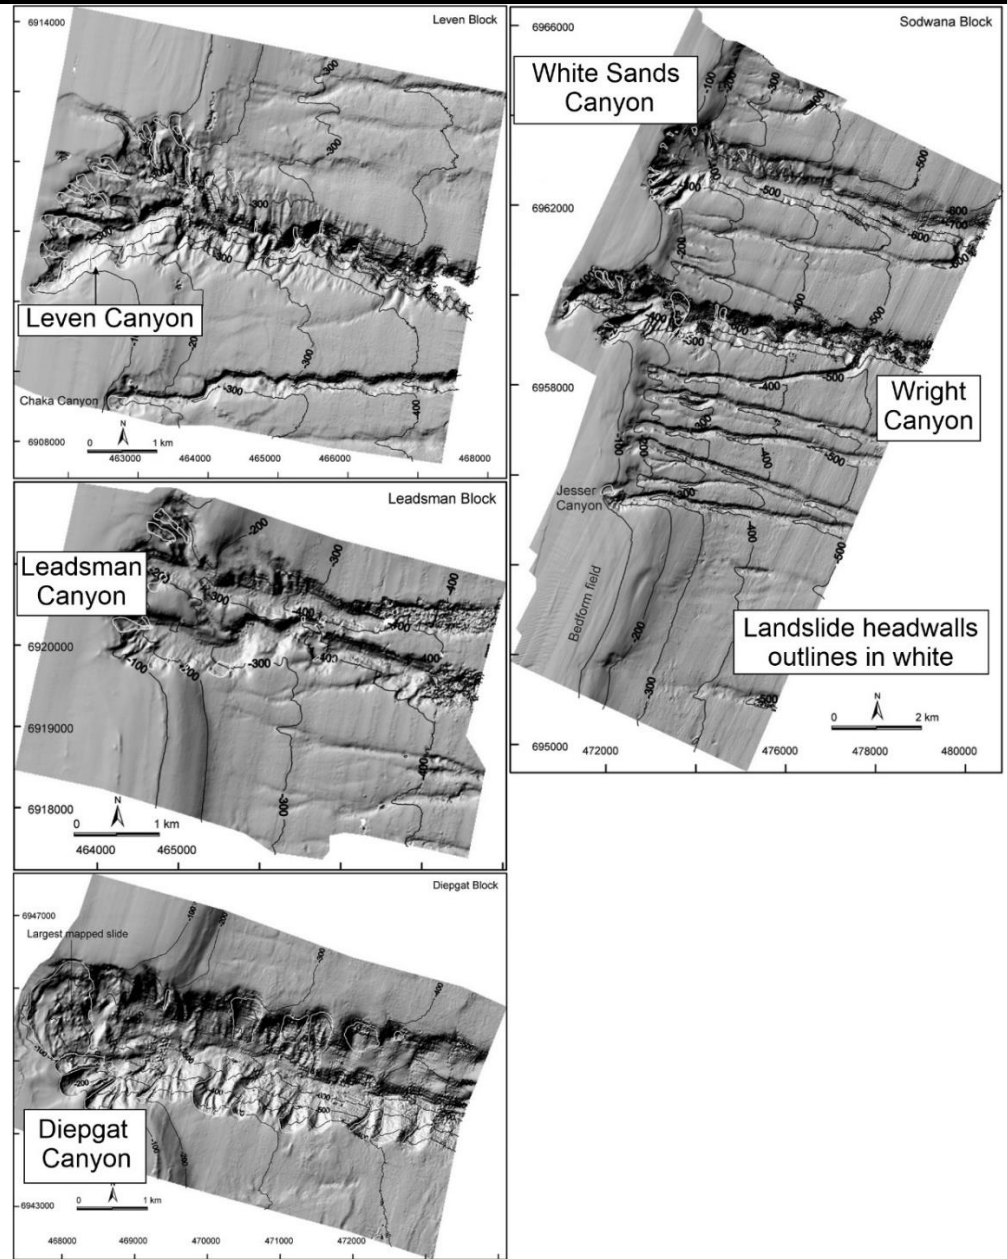

|            |      |    |                                                                     |                                                                                           |  |
|------------|------|----|---------------------------------------------------------------------|-------------------------------------------------------------------------------------------|--|
|            |      |    | Green, 2011 <sup>62</sup>                                           | seismic reflection data.                                                                  |  |
| Mabibi     |      | 10 | Green and Uken, 2008 <sup>61</sup><br><br>Green, 2011 <sup>62</sup> | Arcuate headwalls in canyon and on mid-canyon walls. Slump deposit in the canyon thalweg. |  |
| Sur        | 1998 | 25 | Harris et al. 2014 <sup>63</sup>                                    | Arcuate landslide scars and multiple terraces visible.                                    |  |
| Partington | 1998 | 25 | Harris et al. 2014 <sup>63</sup>                                    | Arcuate landslide scars and multiple terraces visible.                                    |  |

|              |                  |            |                                                                     |                                                                             |                                                                                                                                                                                                                                                                                                                                                                                                                                                                                                                                                                                                                                                                                                                                                                                                        |
|--------------|------------------|------------|---------------------------------------------------------------------|-----------------------------------------------------------------------------|--------------------------------------------------------------------------------------------------------------------------------------------------------------------------------------------------------------------------------------------------------------------------------------------------------------------------------------------------------------------------------------------------------------------------------------------------------------------------------------------------------------------------------------------------------------------------------------------------------------------------------------------------------------------------------------------------------------------------------------------------------------------------------------------------------|
| Avon         | 2012             |            | Jimoh et al. 2018 <sup>64</sup>                                     | Sidewall scarps and terraces visible.                                       |                                                                                                                                                                                                                                                                                                                                                                                                                                                                                                                                                                                                                                                                                                                                                                                                        |
| Cap de Creus | 1995, 2002, 2004 | 4, 50, 200 | Lastras et al. 2007 <sup>65</sup>                                   | Side wall slumping leading to narrowing of the canyon thalweg.              | 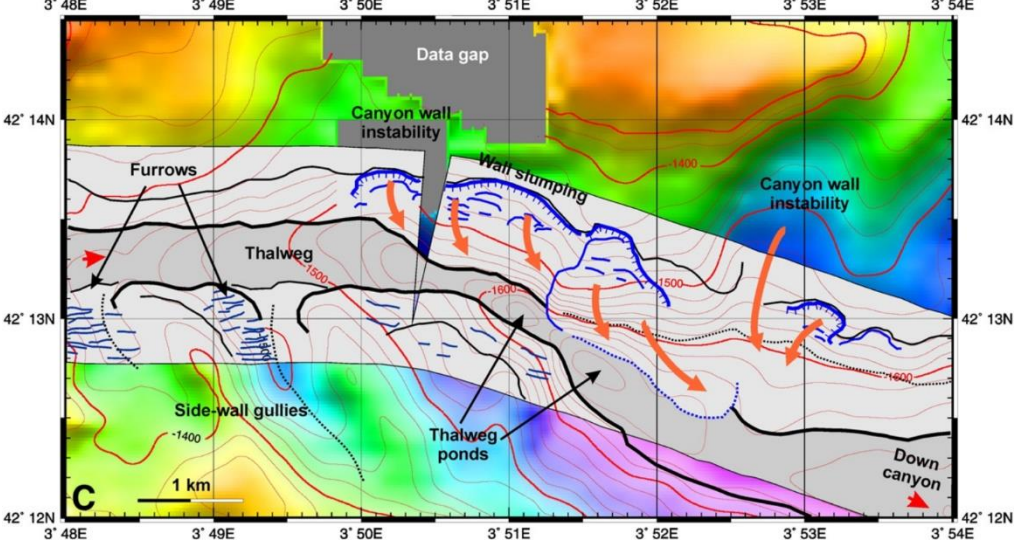 <p>A topographic map of the Cap de Creus canyon. The map uses a color gradient from green (lower elevations) to red and orange (higher elevations). Key features are labeled: 'Furrows' (shallow depressions), 'Thalweg' (the main channel), 'Side-wall gullies' (small channels on the slopes), 'Thalweg ponds' (small pools in the channel), 'Wall slumping' (indicated by blue arrows and dashed lines), 'Canyon wall instability' (indicated by red arrows and dashed lines), and 'Down canyon' (indicated by a red arrow). A 'Data gap' is shown in a grey box at the top. A 1 km scale bar is located at the bottom left. The map is bounded by coordinates 3° 48'E to 3° 54'E and 42° 12'N to 42° 14'N.</p> |
| Indus        | 2008             |            | Clift et al. 2014 <sup>66</sup><br><br>Li et al. 2018 <sup>67</sup> | Terraces and arcuate scars visible. Slump deposits visible in seismic data. |  <p>Two panels, A and B, showing topographic maps of the Indus canyon. Panel A (left) shows a section of the canyon with labels for 'Terraces', 'Indus-26', 'SO90-188', and 'Arcuate Headwalls'. Panel B (right) shows another section with labels for 'Terraces', 'Indus-27', and 'Indus-28'. Both panels show contour lines and elevation markers (e.g., 1000, 1100, 1200, 1300). The maps are bounded by coordinates 66° 43'E to 67° 15'E and 22° 53'N to 23° 17'N.</p>                                                                                                                                                                                                                                         |



|                |  |  |                                                                         |                                                                                                             |                                                                                                                                                                                                                                                                                                                                                                                                                                                                                                                                                                   |
|----------------|--|--|-------------------------------------------------------------------------|-------------------------------------------------------------------------------------------------------------|-------------------------------------------------------------------------------------------------------------------------------------------------------------------------------------------------------------------------------------------------------------------------------------------------------------------------------------------------------------------------------------------------------------------------------------------------------------------------------------------------------------------------------------------------------------------|
| <p>Gaoping</p> |  |  | <p>Yeh et al. 2013<sup>68</sup></p> <p>Liu et al. 2016<sup>69</sup></p> | <p>Canyon-rim slumping and landslides visible in bathymetry. Slump deposits identified in seismic data.</p> | <p>The figure consists of two 3D bathymetric maps of Gaoping Canyon, oriented with North (N) at the top. The top map shows a wide view of the canyon with labels for 'turbidite deposit', 'boulder', 'minor channel', 'Kaoping Canyon', 'carbonate ridge', and 'channel cutting'. The bottom map provides a closer view of the canyon rim, highlighting 'landslide deposit', 'slumping cliff', and 'slope basin'. Both maps use a color scale to represent depth, with red and yellow indicating shallower areas and blue and purple indicating deeper areas.</p> |
|----------------|--|--|-------------------------------------------------------------------------|-------------------------------------------------------------------------------------------------------------|-------------------------------------------------------------------------------------------------------------------------------------------------------------------------------------------------------------------------------------------------------------------------------------------------------------------------------------------------------------------------------------------------------------------------------------------------------------------------------------------------------------------------------------------------------------------|

|          |                     |    |                                           |                                                     |
|----------|---------------------|----|-------------------------------------------|-----------------------------------------------------|
| Mondello | 2001,<br>2004, 2009 | 15 | Lo lacono<br>et al.<br>2011 <sup>70</sup> | Headscarps<br>present at<br>heads of<br>gullies.    |
| Addaura  | 2001,<br>2004, 2009 | 15 | Lo lacono<br>et al.<br>2011 <sup>70</sup> | Headscarps<br>present<br>along<br>northern<br>wall. |

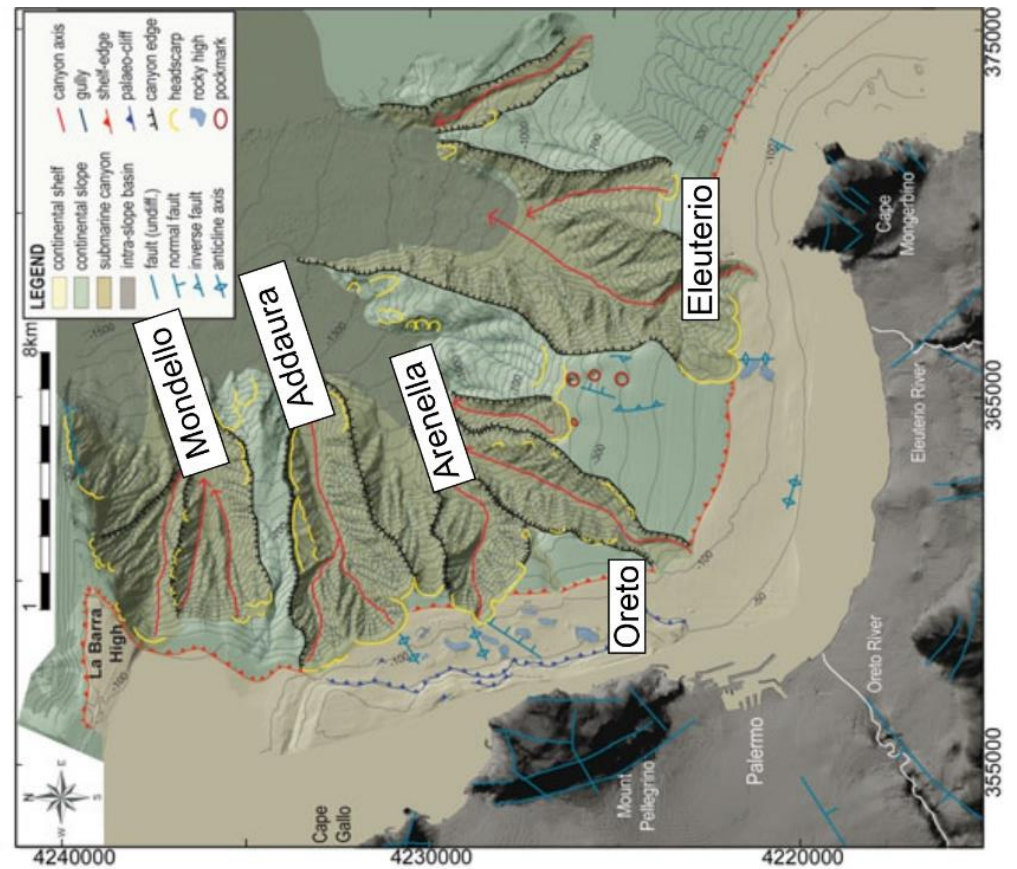

|           |                  |    |                                     |                                                                              |  |
|-----------|------------------|----|-------------------------------------|------------------------------------------------------------------------------|--|
| Oreto     | 2001, 2004, 2009 | 15 | Lo Iacono et al. 2011 <sup>70</sup> | Headscarps visible. Obstruction clearly visible in canyon thalweg.           |  |
| Eleuterio | 2001, 2004, 2009 | 15 | Lo Iacono et al. 2011 <sup>70</sup> | Headscarps visible. 20 m high obstruction clearly visible in canyon thalweg. |  |
| Cook      | 2002, 2005       | 10 | Micallef et al. 2013 <sup>71</sup>  | Landslide scars clearly visible in bathymetry.                               |  |
| Nicholson | 2002, 2005       | 10 | Micallef et al. 2013 <sup>71</sup>  | Landslide scars clearly visible in bathymetry.                               |  |
| Wairarapa | 2002, 2005       | 10 | Micallef et al. 2013 <sup>71</sup>  | Landslide scars clearly visible in bathymetry.                               |  |

|              |            |     |                                    |                                                                                              |  |
|--------------|------------|-----|------------------------------------|----------------------------------------------------------------------------------------------|--|
| Campbell     | 2002, 2005 | 10  | Micallef et al. 2013 <sup>71</sup> | Landslide scars clearly visible in bathymetry.                                               |  |
| Palliser     | 2002, 2005 | 10  | Micallef et al. 2013 <sup>71</sup> | Landslide scars clearly visible in bathymetry. Landslide blocks are visible on canyon floor. |  |
| Opouawe      | 2002, 2005 | 10  | Micallef et al. 2013 <sup>71</sup> | Landslide scars clearly visible in bathymetry.                                               |  |
| Embro Margin | 1995, 1999 | 50  | Micallef et al. 2014 <sup>72</sup> | Slide scars visible in bathymetry. Multiple terrace levels visible.                          |  |
| Mona         | 1995, 2004 | 150 | Mondziel et al. 2010 <sup>73</sup> | Landslide headscarps visible. Slump deposits                                                 |  |

|          |                             |    |                                    |                                                                               |                                                                                                                                                                                                                                                                                                                                                                                                                                                                                                                                                                                                                                                                              |
|----------|-----------------------------|----|------------------------------------|-------------------------------------------------------------------------------|------------------------------------------------------------------------------------------------------------------------------------------------------------------------------------------------------------------------------------------------------------------------------------------------------------------------------------------------------------------------------------------------------------------------------------------------------------------------------------------------------------------------------------------------------------------------------------------------------------------------------------------------------------------------------|
|          |                             |    |                                    | visible in seismic data.                                                      |                                                                                                                                                                                                                                                                                                                                                                                                                                                                                                                                                                                                                                                                              |
| Kaikoura | 2018<br>(Repeat bathymetry) | 25 | Mountjoy et al. 2018 <sup>11</sup> | Canyon rim landslide evacuated through the canyon triggered by an earthquake. | <p>The figure consists of three panels labeled A, B, and C, illustrating bathymetric data of the Kaikoura Canyon. Panel A is a detailed map of the canyon area, showing sea floor change in meters. A color scale legend indicates erosion (red) and deposit (blue). The scale ranges from -40 m (dark red) to 20 m (dark blue), with 0 m in white. The map shows significant erosion (red) along the canyon rim and walls. Panel B is a zoomed-in view of the canyon rim, showing a 400 m scale bar. Panel C shows the Hundalee Fault, a prominent linear feature, with a 400 m scale bar. The location is marked as Kaikoura, and the longitude is given as 173°40' E.</p> |

| <p>Perth</p>        | <p>2014, 2015, 2017, 2018</p> <p>(Repeat bathymetry in some areas)</p> | <p>20</p>          | <p>Nanson et al. 2022<sup>74</sup></p> | <p>Landslide scars visible. Repeat bathymetry shows failures of some canyon headwalls due to earthquakes. Small accumulations of slump deposits visible in thalweg.</p> | <p><b>Change in seafloor pre- and post 2018</b></p> <p>Difference<br/>+ 78 m<br/>- 61 m</p> <p>1 km</p> <p><b>Geomorphology map</b></p> <p>map limit, blind canyon, Escarpment, slump scar, fan levee, NP4, entrenched fan floor, cyclic step (or block), Slope, plunge pool (or block top), terrace dunes, slab, channel, gully network, Figure 13, sediment wave, Rottne Island, Swan River, Figure 12A, Figure 12B, Figure 14, map limit, 40 m grid (ship tracks), (inset: i), (inset: ii), 20 km, -5000 0</p> <table border="1"> <thead> <tr> <th>Morphology surfaces</th> <th>Geomorphology:</th> <th>Incisional</th> <th>Failure</th> <th>Aggradational</th> </tr> </thead> <tbody> <tr> <td>Plane</td> <td>channel</td> <td>palaeo-valley belt</td> <td>slab</td> <td>sediment wave</td> </tr> <tr> <td>Slope</td> <td>floor</td> <td>gully network</td> <td>slump scar</td> <td>cyclic step (or block)</td> </tr> <tr> <td>Escarpment</td> <td>plunge pool (or block top)</td> <td>entrenched floor</td> <td>block</td> <td>dunes</td> </tr> <tr> <td></td> <td>nick-point</td> <td>blind canyon</td> <td>creep</td> <td>levee</td> </tr> <tr> <td></td> <td></td> <td>terrace</td> <td></td> <td></td> </tr> </tbody> </table> | Morphology surfaces | Geomorphology: | Incisional | Failure | Aggradational | Plane | channel | palaeo-valley belt | slab | sediment wave | Slope | floor | gully network | slump scar | cyclic step (or block) | Escarpment | plunge pool (or block top) | entrenched floor | block | dunes |  | nick-point | blind canyon | creep | levee |  |  | terrace |  |  |
|---------------------|------------------------------------------------------------------------|--------------------|----------------------------------------|-------------------------------------------------------------------------------------------------------------------------------------------------------------------------|-----------------------------------------------------------------------------------------------------------------------------------------------------------------------------------------------------------------------------------------------------------------------------------------------------------------------------------------------------------------------------------------------------------------------------------------------------------------------------------------------------------------------------------------------------------------------------------------------------------------------------------------------------------------------------------------------------------------------------------------------------------------------------------------------------------------------------------------------------------------------------------------------------------------------------------------------------------------------------------------------------------------------------------------------------------------------------------------------------------------------------------------------------------------------------------------------------------------------------------------|---------------------|----------------|------------|---------|---------------|-------|---------|--------------------|------|---------------|-------|-------|---------------|------------|------------------------|------------|----------------------------|------------------|-------|-------|--|------------|--------------|-------|-------|--|--|---------|--|--|
| Morphology surfaces | Geomorphology:                                                         | Incisional         | Failure                                | Aggradational                                                                                                                                                           |                                                                                                                                                                                                                                                                                                                                                                                                                                                                                                                                                                                                                                                                                                                                                                                                                                                                                                                                                                                                                                                                                                                                                                                                                                         |                     |                |            |         |               |       |         |                    |      |               |       |       |               |            |                        |            |                            |                  |       |       |  |            |              |       |       |  |  |         |  |  |
| Plane               | channel                                                                | palaeo-valley belt | slab                                   | sediment wave                                                                                                                                                           |                                                                                                                                                                                                                                                                                                                                                                                                                                                                                                                                                                                                                                                                                                                                                                                                                                                                                                                                                                                                                                                                                                                                                                                                                                         |                     |                |            |         |               |       |         |                    |      |               |       |       |               |            |                        |            |                            |                  |       |       |  |            |              |       |       |  |  |         |  |  |
| Slope               | floor                                                                  | gully network      | slump scar                             | cyclic step (or block)                                                                                                                                                  |                                                                                                                                                                                                                                                                                                                                                                                                                                                                                                                                                                                                                                                                                                                                                                                                                                                                                                                                                                                                                                                                                                                                                                                                                                         |                     |                |            |         |               |       |         |                    |      |               |       |       |               |            |                        |            |                            |                  |       |       |  |            |              |       |       |  |  |         |  |  |
| Escarpment          | plunge pool (or block top)                                             | entrenched floor   | block                                  | dunes                                                                                                                                                                   |                                                                                                                                                                                                                                                                                                                                                                                                                                                                                                                                                                                                                                                                                                                                                                                                                                                                                                                                                                                                                                                                                                                                                                                                                                         |                     |                |            |         |               |       |         |                    |      |               |       |       |               |            |                        |            |                            |                  |       |       |  |            |              |       |       |  |  |         |  |  |
|                     | nick-point                                                             | blind canyon       | creep                                  | levee                                                                                                                                                                   |                                                                                                                                                                                                                                                                                                                                                                                                                                                                                                                                                                                                                                                                                                                                                                                                                                                                                                                                                                                                                                                                                                                                                                                                                                         |                     |                |            |         |               |       |         |                    |      |               |       |       |               |            |                        |            |                            |                  |       |       |  |            |              |       |       |  |  |         |  |  |
|                     |                                                                        | terrace            |                                        |                                                                                                                                                                         |                                                                                                                                                                                                                                                                                                                                                                                                                                                                                                                                                                                                                                                                                                                                                                                                                                                                                                                                                                                                                                                                                                                                                                                                                                         |                     |                |            |         |               |       |         |                    |      |               |       |       |               |            |                        |            |                            |                  |       |       |  |            |              |       |       |  |  |         |  |  |

|                |                                   |   |                                      |                           |                                                                                    |
|----------------|-----------------------------------|---|--------------------------------------|---------------------------|------------------------------------------------------------------------------------|
| Pont-des-Monts | 2007, 2012<br>(Repeat bathymetry) | 3 | Normandeau et al. 2014 <sup>75</sup> | Small scarps are visible. | 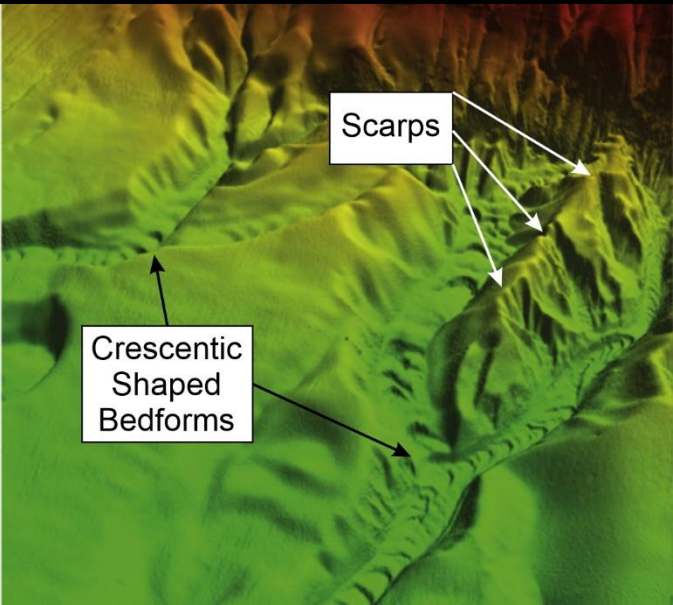 |
|----------------|-----------------------------------|---|--------------------------------------|---------------------------|------------------------------------------------------------------------------------|

|      |      |    |                                  |                                             |  |
|------|------|----|----------------------------------|---------------------------------------------|--|
| Goto | 2008 | 25 | Oiwane et al. 2011 <sup>76</sup> | Landslide headwalls observed in bathymetry. |  |
|------|------|----|----------------------------------|---------------------------------------------|--|



|          |      |     |                                 |                                                     |
|----------|------|-----|---------------------------------|-----------------------------------------------------|
| La Jolla | 2008 | 0.7 | Paull et al. 2013 <sup>77</sup> | Arcuate shaped scarps and terraces clearly visible. |
|----------|------|-----|---------------------------------|-----------------------------------------------------|

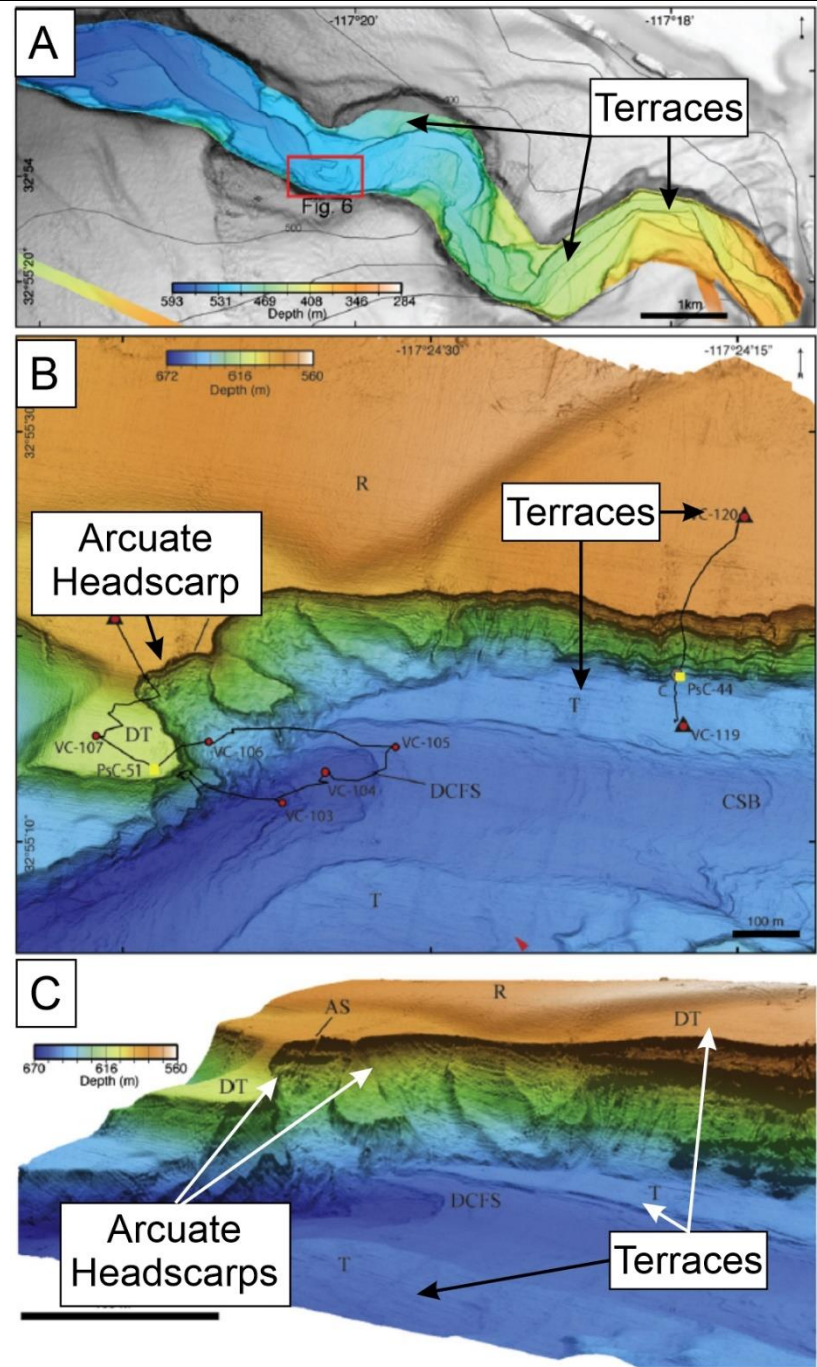

|       |            |    |                                        |                              |                                                                                                                                                                 |
|-------|------------|----|----------------------------------------|------------------------------|-----------------------------------------------------------------------------------------------------------------------------------------------------------------|
| Gioia | 2009, 2012 | 10 | Pierdomenico et al. 2016 <sup>78</sup> | Landslide headwalls visible. | 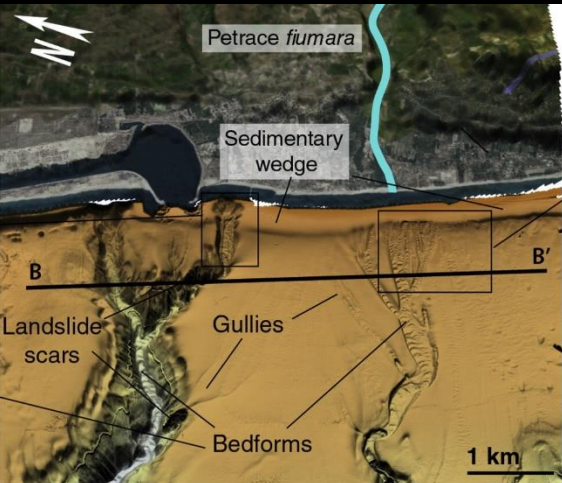 <p data-bbox="1279 560 1839 598"><b>Gioia Canyon      Petrace Canyon</b></p> |
|-------|------------|----|----------------------------------------|------------------------------|-----------------------------------------------------------------------------------------------------------------------------------------------------------------|

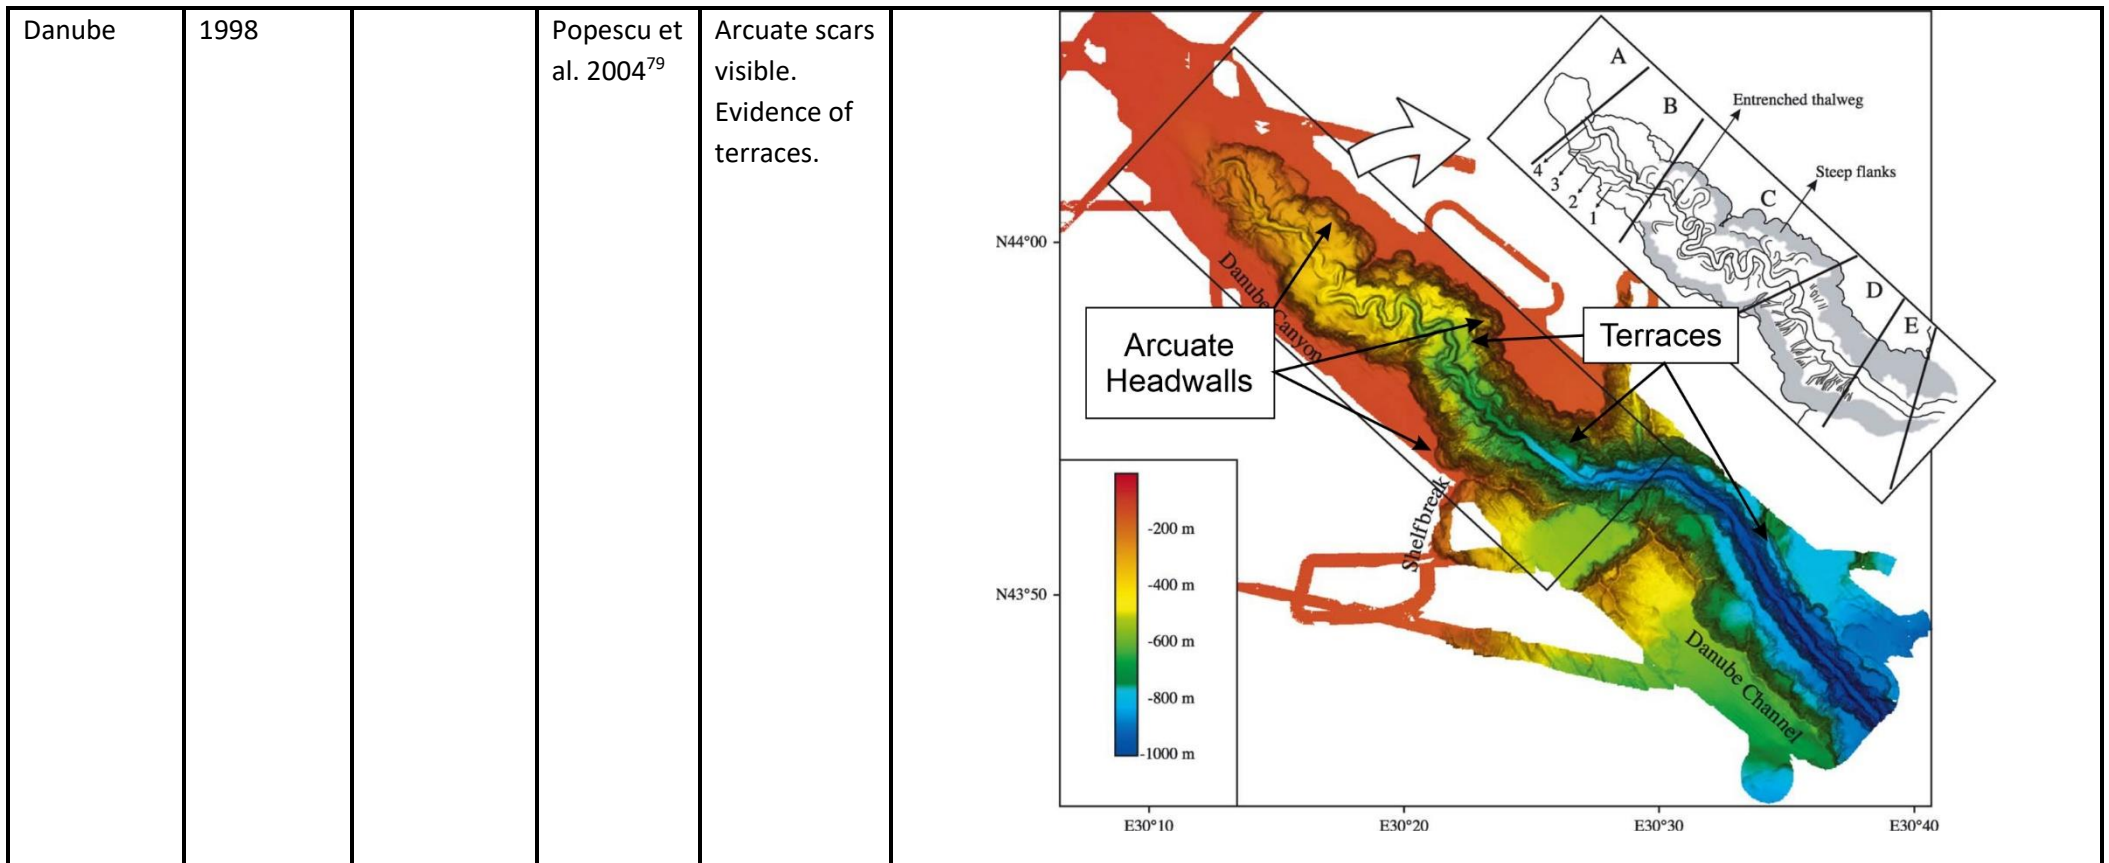

|             |      |    |                                         |                                                                                                                                    |  |
|-------------|------|----|-----------------------------------------|------------------------------------------------------------------------------------------------------------------------------------|--|
| Ribbon Reef | 2007 | 40 | Puga Bernabeu et al. 2011 <sup>80</sup> | Landslide headwalls visible in bathymetry. Suggested that knickpoints in canyon long profiles may be the result of slide deposits. |  |
| Patia/Mira  | 2005 | 60 | Ratzov et al. 2012 <sup>81</sup>        | Headscarps visible in bathymetry. Slump deposit has resulted in a canyon dam and infill visible in seismic data.                   |  |

|                 |                     |     |                                             |                                              |                                                                                                                                                                                                                                                                                                                                                                               |
|-----------------|---------------------|-----|---------------------------------------------|----------------------------------------------|-------------------------------------------------------------------------------------------------------------------------------------------------------------------------------------------------------------------------------------------------------------------------------------------------------------------------------------------------------------------------------|
| Hudson          | 2007,<br>2008, 2009 | 3   | Rona et al.<br>2015 <sup>82</sup>           | Landslide<br>scars visible<br>on side walls. | 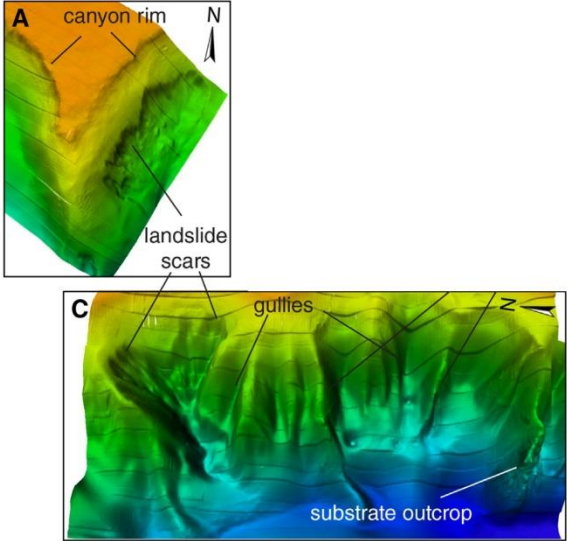 <p>Figure A: 3D topographic map showing a canyon rim (orange) and landslide scars (green/yellow) on the side walls. A north arrow is present.</p> <p>Figure C: 3D topographic map showing gullies (green/yellow) and a substrate outcrop (blue) at the base. A north arrow is present.</p> |
| São<br>Vincente | 2001 –<br>2009      | 250 | Serra et al.<br>2020 <sup>83</sup>          | Slide scars<br>visible.                      |                                                                                                                                                                                                                                                                                                                                                                               |
| Bahama<br>Bank  | 2010                | 20  | Tournadou<br>r et al.<br>2017 <sup>84</sup> | Arcuate<br>scarps<br>visible.                |  <p>Figure A: 3D topographic map of Bahama Bank showing arcuate headscarps. The map includes profiles a, b, c, and d. Distances of 1.2 Km and 3 Km are indicated. A vertical exaggeration of x 5 is noted. A north arrow is present.</p>                                                  |

|                    |                                   |         |                                              |                                               |                                                                                                                                                                                                                                                                                                                                                                                                                                                                                                                                                                                                                                                                                                                                                                                                                              |
|--------------------|-----------------------------------|---------|----------------------------------------------|-----------------------------------------------|------------------------------------------------------------------------------------------------------------------------------------------------------------------------------------------------------------------------------------------------------------------------------------------------------------------------------------------------------------------------------------------------------------------------------------------------------------------------------------------------------------------------------------------------------------------------------------------------------------------------------------------------------------------------------------------------------------------------------------------------------------------------------------------------------------------------------|
| Mozambique Channel | 2014                              | 40      | Wiles et al. 2019 <sup>85</sup>              | Mass wasting scars identified on sidewalls.   | 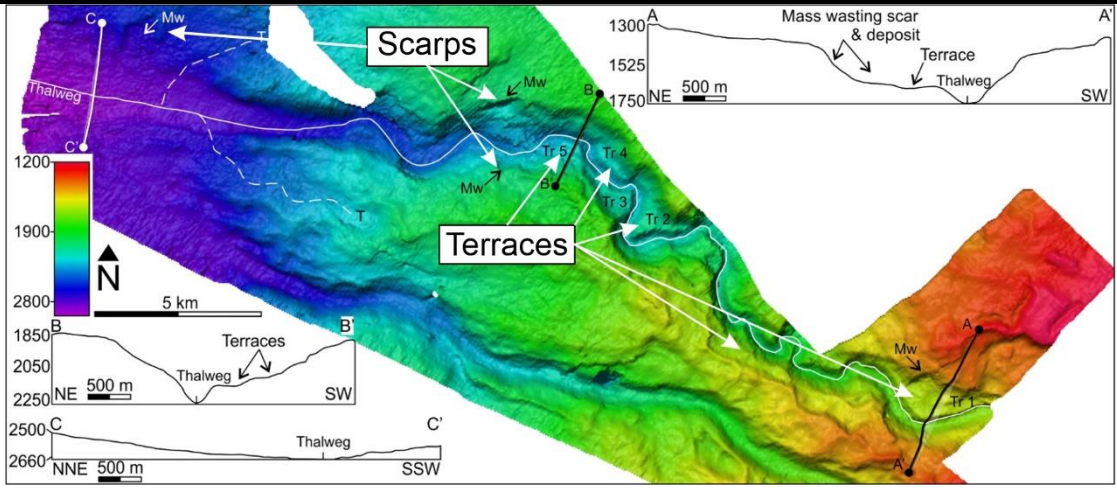 <p>This figure is a bathymetric map of a section of the Mozambique Channel. The map uses a color scale to represent depth, with shallower areas in red and orange, and deeper areas in blue and purple. Key features are labeled: 'Scarps' (steep slopes) and 'Terraces' (flatter, stepped areas). Specific terraces are labeled Tr 1 through Tr 5. Mass wasting scars (Mw) are also indicated. Three cross-sections are shown: A-A' at the top right, B-B' in the middle, and C-C' at the bottom. Each cross-section shows the profile of the channel floor and labels features like 'Mass wasting scar &amp; deposit', 'Terrace', and 'Thalweg' (the deepest part of the channel). A 5 km scale bar and a north arrow are included.</p> |
| Capbreton          | 1998, 2020<br>(Repeat bathymetry) | 0.5 - 5 | Guiastrennec-Faugas et al. 2020 <sup>6</sup> | Arcuate slide scars, slump scars and terraces |  <p>This figure is a bathymetric map of the Capbreton area. It shows a complex, winding channel system. Key features are labeled: 'Arcuate headwalls' (curved, steep slopes at the start of channel segments), 'Terraces' (flatter areas within the channel), and 'Mass transport deposits' (large, reddish-shaded areas on the right side of the map). A bathymetry scale is provided, ranging from -15 m (red) to -375 m (blue). The map includes a north arrow, a 1 km scale bar, and geographic coordinates: latitude 43.67° and longitude -1.53°, -1.50°, and -1.47°.</p>                                                                                                                                                           |
| Monterey           | 2008, 2009                        | 1       | Paull et al. 2011 <sup>86</sup>              | Arcuate scars visible on canyon sidewalls     |                                                                                                                                                                                                                                                                                                                                                                                                                                                                                                                                                                                                                                                                                                                                                                                                                              |

|        |            |   |                                 |                                           |                                                                                                                                                                                                                                                                                                                                                                                                                                                                                                                                                                                                                                                                                                                                                                                                        |
|--------|------------|---|---------------------------------|-------------------------------------------|--------------------------------------------------------------------------------------------------------------------------------------------------------------------------------------------------------------------------------------------------------------------------------------------------------------------------------------------------------------------------------------------------------------------------------------------------------------------------------------------------------------------------------------------------------------------------------------------------------------------------------------------------------------------------------------------------------------------------------------------------------------------------------------------------------|
| Soquel | 2008, 2009 | 1 | Paull et al. 2011 <sup>86</sup> | Arcuate scars visible on canyon sidewalls | 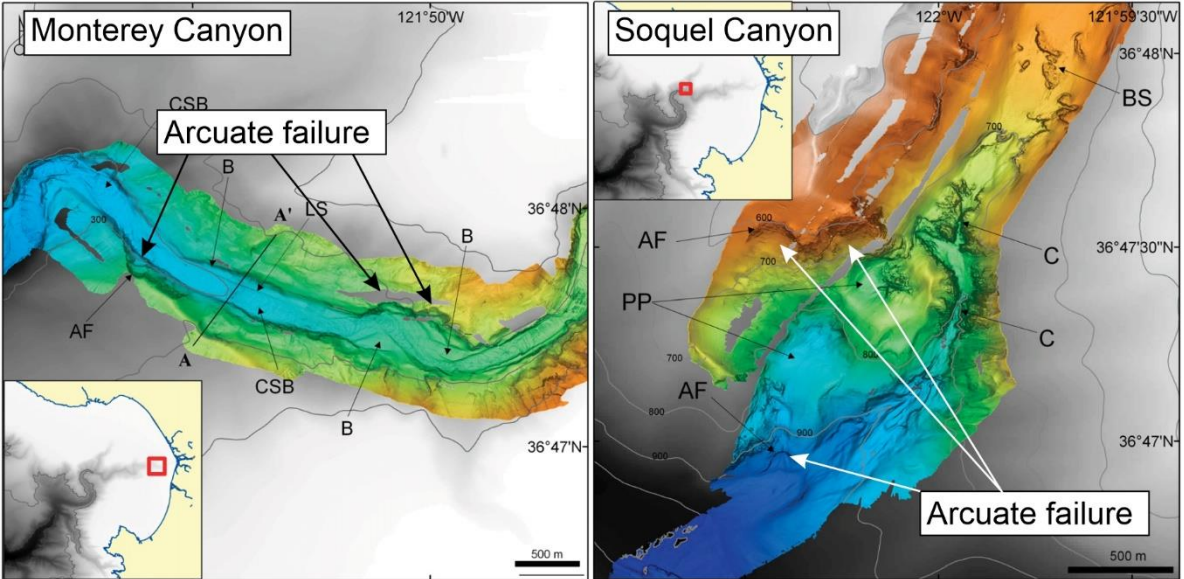 <p>The figure consists of two bathymetric maps. The left map is titled 'Monterey Canyon' and shows a cross-section of the canyon with labels for 'CSB' (Canyon Side Bank), 'AF' (Arcuate Failure), 'A', 'A'', 'LS' (Lateral Scar), and 'B'. A box labeled 'Arcuate failure' has arrows pointing to several curved features on the canyon walls. The right map is titled 'Soquel Canyon' and shows a similar cross-section with labels for 'BS' (Basal Scar), 'AF', 'PP' (Pinnacled Point), and 'C'. A box labeled 'Arcuate failure' has arrows pointing to curved features on the canyon walls. Both maps include a 500 m scale bar and an inset map showing the canyon's location on a larger geographic scale.</p> |
|--------|------------|---|---------------------------------|-------------------------------------------|--------------------------------------------------------------------------------------------------------------------------------------------------------------------------------------------------------------------------------------------------------------------------------------------------------------------------------------------------------------------------------------------------------------------------------------------------------------------------------------------------------------------------------------------------------------------------------------------------------------------------------------------------------------------------------------------------------------------------------------------------------------------------------------------------------|

38

39

40



41 STable. 2. Estimates of sediment and organic carbon masses displaced by submarine mass movement  
 42 events, flood events and annual discharges from selected large rivers. The table demonstrates the  
 43 efficiency of sediment and carbon capture and storage by the Congo Canyon landslide-dam.

|                                       |                                             | Displaced Mass<br>(Mt)                                  | Organic Carbon<br>(Mt C)     | Reference                                    |
|---------------------------------------|---------------------------------------------|---------------------------------------------------------|------------------------------|----------------------------------------------|
| <b>Marine Settings</b>                |                                             |                                                         |                              |                                              |
| Congo Canyon                          | Landslide                                   | 120±10                                                  | 3.2 - 3.5 (min 3.1, max 3.8) | This study                                   |
| Congo Canyon                          | Infill                                      | 170±40                                                  | 4.6 - 5 (min 3.9, max 6.2)   | This study                                   |
|                                       | Total                                       | 290±50                                                  | 7.8 - 8.5 (min 7, max 10)    | This study                                   |
| Kaikōura Canyon/<br>Hikurangi Channel | 2016 Kaikōura<br>Earthquake/Landslide       | 850                                                     | 7                            | Mountjoy et al. 2018                         |
| Continental shelf/<br>Japan Trench    | 2011 Tohoku-oki<br>Earthquake/mass movement | 360'                                                    | >1.73                        | Kioka et al. 2019                            |
| <b>Fluvial Events</b>                 |                                             |                                                         |                              |                                              |
| Eel River                             | 1995 flood                                  | 25                                                      | 0.24                         | Leithold and Hope, 1999                      |
| North St. Vrain Creek                 | 2013 flood                                  | 0.216                                                   | 0.01                         | Rathburn et al. 2017                         |
| Kaoping River/Stored<br>on floodplain | 2009 Typhoon Morakot flood                  |                                                         | 0.72*                        | West et al. 2011                             |
| Kaoping River                         | 2009 Typhoon Morakot flood                  |                                                         | 1.2 - 2.5*                   | West et al. 2011                             |
| Choshui River                         | 2004 Typhoon Mindulle flood                 | 61.4                                                    | 0.5                          | Goldsmith et al. 2008                        |
| <b>Annual fluvial<br/>discharge</b>   |                                             |                                                         |                              |                                              |
|                                       |                                             |                                                         |                              | Baudin et al. 2020<br>Coynel et al. 2005     |
| Congo                                 |                                             | 43                                                      | 2                            | Milliman and Farnsworth, 2011                |
|                                       |                                             |                                                         |                              | Bouchez et al. 2014                          |
| Amazon                                |                                             | 900                                                     | 11.5                         | Milliman and Farnsworth, 2011                |
|                                       |                                             |                                                         |                              | Wakeham et al. 2009<br>Rosenheim et al. 2013 |
| Mississippi                           |                                             | 210                                                     | 9                            | Milliman and Farnsworth, 2011                |
|                                       |                                             |                                                         |                              | Li et al. 2015                               |
| Yangtze                               |                                             | 478                                                     | 4.4                          | Milliman and Farnsworth, 2011                |
|                                       |                                             |                                                         |                              | Galy et al. 2008<br>Galy and Eglinton, 2011  |
| Ganges/Brahmaputra                    |                                             | 1670                                                    | 8                            | Milliman and Farnsworth, 2011                |
|                                       |                                             |                                                         |                              | Hilton et al. 2015                           |
| Mackenzie                             |                                             | 100                                                     | 2                            | Milliman and Farnsworth, 2011                |
|                                       |                                             |                                                         |                              | Galy et al. 2015                             |
|                                       | <b>Global Total</b>                         | 19,000 ± 500                                            | 200 +135/-75                 | Milliman and Farnsworth, 2011                |
| Notes                                 |                                             | *Coarse woody debris<br>'assumes density of 1,300 kg/m3 |                              |                                              |

44

45
